# Supplementary material
Source: Elsevier journal article supplement (https://www.sciencedirect.com/science/article/pii/S1699258X18302225)
Supplement: mmc2 [file S1699258X18302225:mmc2.docx]

**Anexo 2.**

**Centros participantes en el estudio REAPSER.**

| **HOSPITAL** | **LOCALIDAD** | **PROVINCIA** |
| --- | --- | --- |
| H. U. Reina Sofía | Córdoba | Córdoba |
| H. U. San Cecilio | Granada | Granada |
| H. U. Virgen Macarena | Sevilla | Sevilla |
| H. U. Virgen del Rocío | Sevilla | Sevilla |
| H. C. U. Lozano Blesa | Zaragoza | Zaragoza |
| H. de Cabueñes | Gijón | Asturias |
| H. U. Central de Asturias (centro coordinador) | Oviedo | Asturias |
| H. Can Misses | Ibiza | Ibiza |
| C.H.U. Insular Materno-Infantil | Las palmas de Gran Canaria | Palmas (Las) |
| H. U. de Canarias | Santa Cruz de Tenerife | Santa Cruz de Tenerife |
| C.A.U, de León | León | León |
| H. U. de Salamanca | Salamanca | Salamanca |
| H. C. U. de Valladolid | Valladolid | Valladolid |
| H. Clinic i Provincial | Barcelona | Barcelona |
| H. de la Santa Creu i Sant Pau | Barcelona | Barcelona |
| H. U. de Bellvitge | Hospitalet de Llobregat | Barcelona |
| H. U. Parc Taulí | Sabadell | Barcelona |
| C.H.U. de A Coruña | Coruña (A) | Coruña (A) |
| C.H.U. de Vigo | Vigo | Pontevedra |
| H. U. Fundación Alcorcón | Alcorcón | Madrid |
| H. U. 12 de Octubre | Madrid | Madrid |
| H. U. Gregorio Marañón | Madrid | Madrid |
| H. U. Infanta Leonor | Madrid | Madrid |
| H. U. Infanta Sofía | San Sebastián de los Reyes | Madrid |
| H. C. U. Virgen de la Arrixaca | Murcia | Murcia |
| H. U. Basurto | Bilbao | Bizkaia |
| H. Marina Baixa | Villajoyosa | Alicante/Alacant |
| H. G. U. de Castellón | Castellón | Castellón/Castelló |
| H. C. U. de Valencia | Valencia | Valencia/València |
| H. Moisès Broggi-l´Hospitalet | Sant Joan Despí-l´Hospitalet | Barcelona |
| H. G. U. de Elda | Elda | Alicante |
| H. G. U. de Alicante | Alicante | Alicante |
| H. Son Llàtzer | Palma de Mallorca | Mallorca |
| H. Jerez de la Frontera | Jerez de la Frontera | Cádiz |
